# Supplementary material for: Exploring tarhana's prebiotic potential using different flours in an in vitro fermentation model
Source: Royal Society of Chemistry journal article supplement (doi:10.1039/d5fo00486a), 2025-01-01
Supplement: d5fo00486a1.pdf [file d5fo00486a1.pdf]

## Supplementary Methods

### ***In vitro* digestion and *in vitro* colonic fermentation**

*In vitro* digestion was performed according to INFOGEST 2.0 method which was described previously<sup>1, 2</sup>. Ten mL of boiled and cooled tarhana soup was used as the starting material. Cellulose and inulin were also subjected to *in vitro* digestion and colonic fermentation as well as tarhana soups. Five grams of starting material was used for both controls. The entire procedure was performed at a constant temperature of 37°C on a rotator (VWR, Radnor, PA, United States). The oral phase of digestion was performed for 2 minutes at 37°C, during which the sample was mixed with simulated saliva solution containing  $\alpha$ -amylase (1,500 U mL<sup>-1</sup>, Sigma, A0521) and the pH was adjusted to 7. Following the oral phase, the mixture underwent gastric digestion for 2 hours. This phase involved the addition of simulated gastric solution and pepsin enzyme (25,000 U mL<sup>-1</sup>, Sigma, P6887), maintaining the mixture at 37°C while continuously rotating, with the pH adjusted to 3. The final phase was the intestinal digestion, which included gastric chyme, simulated intestinal fluid electrolyte solution, pancreatin (800 U mL<sup>-1</sup>, Sigma, P7545), and fresh bile (10 mM), the pH was adjusted to 7.0 and samples were incubated in an incubating rocking platform shaker at 37°C for 2 h. Afterward, the post-intestinal phase liquids were transferred to dialysis tubes and immersed in water as the dialysate for 24 h. The retentate was taken from dialysis tubing for MicroMatrix™ *in vitro* colonic fermentation experiment.

Following simulated salivary, gastric and intestinal digestion, samples were used in triplicate for the *in vitro* colonic fermentation experiment. Cellulose and inulin were used as negative and positive controls, respectively, for *in vitro* digestion and *in vitro* colonic fermentation in triplicate. Digested soups were abbreviated as CFB\_SD (Chickpea Flour baker's yeast fermented Soup Digested), CFS\_SD (Chickpea Flour Sourdough fermented Soup Digested), EFB\_SD (Einkorn Flour baker's yeast fermented Soup Digested), EFS\_SD (Einkorn Flour

Sourdough fermented Soup Digested), PPB\_SD (Purple Potato flour baker's yeast fermented Soup Digested), PPS\_SD (Purple Potato flour Sourdough fermented Soup Digested), WFB\_SD (Wheat Flour baker's yeast fermented Soup Digested), WFS\_SD (Wheat Flour Sourdough fermented Soup Digested).

Subsequent to *in vitro* digestion, *in vitro* colonic fermentation was conducted based on a previously described protocol <sup>3</sup>. Participant recruitment and stool sample collection were approved by the Clinical Research Ethics Committee of the Cork Teaching Hospitals (review reference numbers: ECM 4 (gg) 11/02/20 & ECM 3 (iii) 22/02/2022). Faecal samples were obtained from nine healthy individuals who had no antibiotic usage for last 3 months, no medicine usage and healthy and pooled in equal amounts for use in a MicroMatrix™ *in vitro* benchtop fermentation system, adhering to a protocol outlined previously <sup>4</sup>. Faecal samples were collected from all individuals in the morning at the Teagasc Moorepark Research Centre. The samples were kept in anaerobic jars in a cold room at 4°C. Within two hours, all samples were transferred to an anaerobic chamber for pooling. Each sample was weighed, and 60 g of each sample was transferred into a stomacher bag and mixed with 400 mL of phosphate buffer. The mixture was then transferred to sterile 50 mL falcon tubes and centrifuged at 4000 g for 25 minutes at 4°C. The supernatant was discarded, and the pellet was washed with phosphate buffer. The falcon tubes were centrifuged again at 4000 g for 25 minutes at 4°C. Following centrifugation, the pellet was dissolved in phosphate buffer containing 25% glycerol. Aliquots were then stored at -80°C until use in MicroMatrix™.

The faecal fermentation medium (FFM) was prepared following the protocol of Fooks and Gibson, 2003 <sup>5</sup> with the following composition: tryptone water (2 g/L), yeast extract (2 g/L), cysteine HCl (1 mg/L), bile salts (0.5 g/L), Tween 80 (2 mL/L), hemin (0.05 mg/L, dissolved in three drops of 1 M NaOH), vitamin K1 (10 µL/L), NaCl (100 mg/L), KH<sub>2</sub>PO<sub>4</sub> (40 mg/L), K<sub>2</sub>HPO<sub>4</sub> (40 mg/L), CaCl<sub>2</sub>·6H<sub>2</sub>O (40 mg/L), MgSO<sub>4</sub>·7H<sub>2</sub>O (10 mg/L), and NaHCO<sub>3</sub> (2 mg/L).

The medium was autoclaved at 121°C for 15 minutes and stored at 4°C until use. For the fermentation process, 2 mL of digesta was added to the fecal fermentation medium and fecal slurry mixture (20%). The fermentation was conducted under anaerobic conditions at 37°C, with the pH maintained at 6.8<sup>3</sup>. The mixture was continuously agitated at 250 rpm using a cassette to ensure homogeneity. Faecal fermentation was performed for 12 hours and samples were collected at baseline (T0) and at the end of fermentation (T12). All samples were collected in 2 mL sterile screw cap tubes. Subsequently, the tubes containing the samples were centrifuged at 16,000 g for 10 minutes at 4°C. Following centrifugation, the pellet was used for DNA extraction to analyse the microbial composition and the supernatant was processed for short-chain fatty acid (SCFA) and branched-chain fatty acid (BCFA) analysis. Following *in vitro* colonic fermentation, faecal samples were labelled with the suffix 'F'; for example, CFB\_SDF represents faecal samples fermented with digested chickpea flour baker's yeast fermented soup.

## References

1. F. Koc, J. Atzler, A. W. Sahin, E. Arendt, R. P. Ross and C. Stanton, Biscuits for the gut: A symphony of FODMAPs and dietary fibre in gut microbiome for irritable bowel syndrome (IBS) management, *Innovative Food Science & Emerging Technologies*, 2024, **97**.
2. A. Brodkorb, L. Egger, M. Alminger, P. Alvito, R. Assuncao, S. Ballance, T. Bohn, C. Bourlieu-Lacanal, R. Boutrou, F. Carriere, A. Clemente, M. Corredig, D. Dupont, C. Dufour, C. Edwards, M. Golding, S. Karakaya, B. Kirkhus, S. Le Feunteun, U. Lesmes, A. Macierzanka, A. R. Mackie, C. Martins, S. Marze, D. J. McClements, O. Menard, M. Minekus, R. Portmann, C. N. Santos, I. Souchon, R. P. Singh, G. E. Vegarud, M. S. J. Wickham, W. Weitschies and I. Recio, INFOGEST static in vitro simulation of gastrointestinal food digestion, *Nat Protoc*, 2019, **14**, 991-1014.
3. F. Koc, I. Sugrue, K. Murphy, S. Renzetti, M. Noort, R. P. Ross and C. Stanton, The microbiome modulating potential of superheated steam (SHS) treatment of dietary fibres, *Innovative Food Science & Emerging Technologies*, 2022, **80**, 13.
4. M. M. O'Donnell, M. C. Rea, F. Shanahan and R. P. Ross, The Use of a Mini-Bioreactor Fermentation System as a Reproducible, High-Throughput ex vivo Batch Model of the Distal Colon, *Front Microbiol*, 2018, **9**, 1844.
5. L. J. Fooks and G. R. Gibson, Mixed culture fermentation studies on the effects of synbiotics on the human intestinal pathogens *Campylobacter jejuni* and *Escherichia coli*, *Anaerobe*, 2003, **9**, 231-242.
